# Supplementary material for: Deubiquitinating Enzyme Specificity for Ubiquitin Chain Topology Profiled by Di-Ubiquitin Activity Probes
Source: PubMed Central journal article supplement — Chem Biol. 2013 Dec 19;20(12):1447–55. doi: 10.1016/j.chembiol.2013.10.012 (PMC3899023; doi:10.1016/j.chembiol.2013.10.012), 2013-12-19
Supplement: mmc1.pdf [file mmc1.pdf]

**SUPPLEMENTAL INFORMATION**

for

**Deubiquitinating enzyme specificity for ubiquitin chain topology profiled  
by di-ubiquitin activity probes**

<sup>1</sup>Joanna F. McGouran, <sup>1</sup>Selina R. Gaertner, <sup>1,2</sup>Mikael Altun, <sup>3,4</sup>Holger B. Kramer and  
<sup>1,4</sup>Benedikt M. Kessler

<sup>1</sup>Target Discovery Institute, Henry Wellcome Building for Molecular Physiology, Nuffield  
Department of Medicine, University of Oxford, Roosevelt Drive, Oxford OX3 7FZ, UK

<sup>2</sup>Present address: Department of Medical Biochemistry and Biophysics, Karolinska  
Institutet, 17177 Stockholm, Sweden

<sup>3</sup>Department of Physiology, Anatomy and Genetics, University of Oxford, South Parks  
Road, OX1 3QX, UK

<sup>4</sup>Corresponding authors

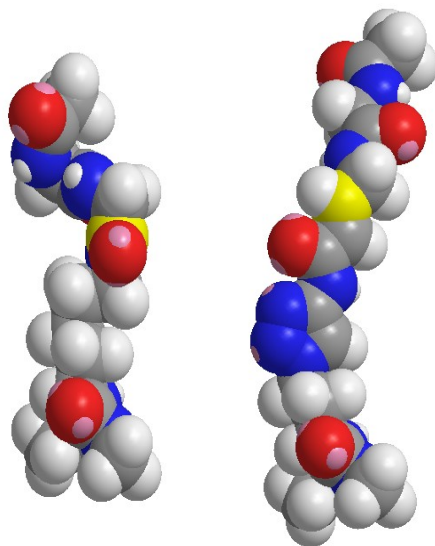

**Figure S1 (related to Figure 1). Modeling of native di-Ub linkage as compared to the linkage present in Di-Ub probes generated in this study**

Structures were generated and minimized accordingly using the ChemBio 3D package (CambridgeSoft/Perkin Elmer). Structures were then aligned with respect to the distal Ub residues (bottom) to allow for direct comparison. The electrophilic carbon atom of the scissile amide bond (left) or the corresponding electrophilic moiety (carbonyl carbon atom of the vinyl amide, right) are indicated in yellow. (Grey: C, Red:O, Blue:N).

**Figure S2 (related to Figure 2). LC-MS/MS results for the ubiquitin mutants**

LC-MS/MS spectra of each Ubiquitin mutant proteins with Aha incorporations at the M1 (**A**), K6 (**B**), K11 (**C**), K27 (**D**), K29 (**E**), K33 (**F**), K48 (**G**) and K63 (**H**) are shown in order to confirm the position of Aha incorporation.

# A Aha Ub (M1)

1 AhaQIFVKTLT GKTITLEVEP SDTIENVKAK IQDKEGIPPD QQLRIFAGKQ

51 LEDGRTLSDY NIQKESTLHL VLRLRGG

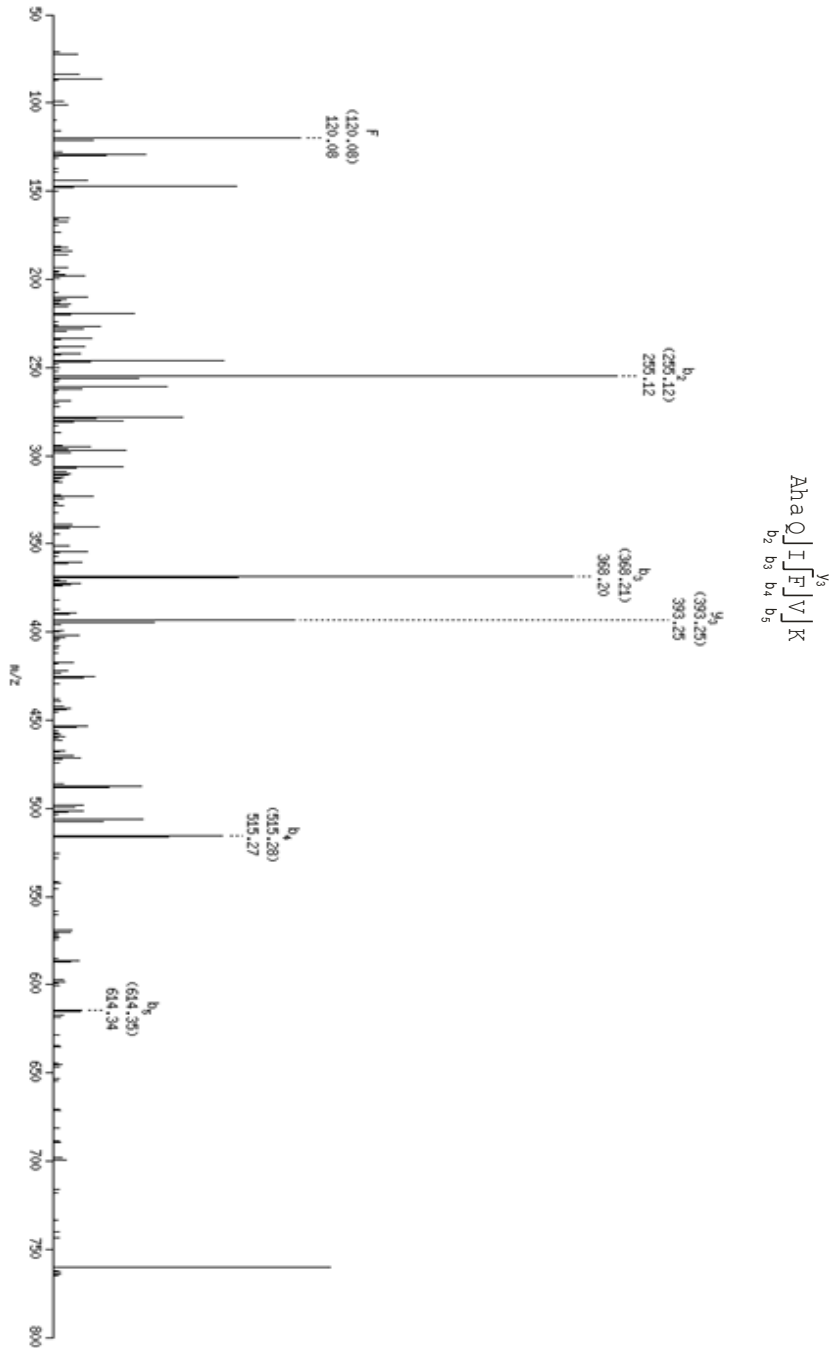

**B K6Aha Ub**

**1 MAQIFVAhaTLT GKTITLEVEP SDTIENVKAK IQDKEGIPPD QQRLIFAGKQ**

**51 LEDGRTLSDY NIQKESTLHL VLRLRGG**

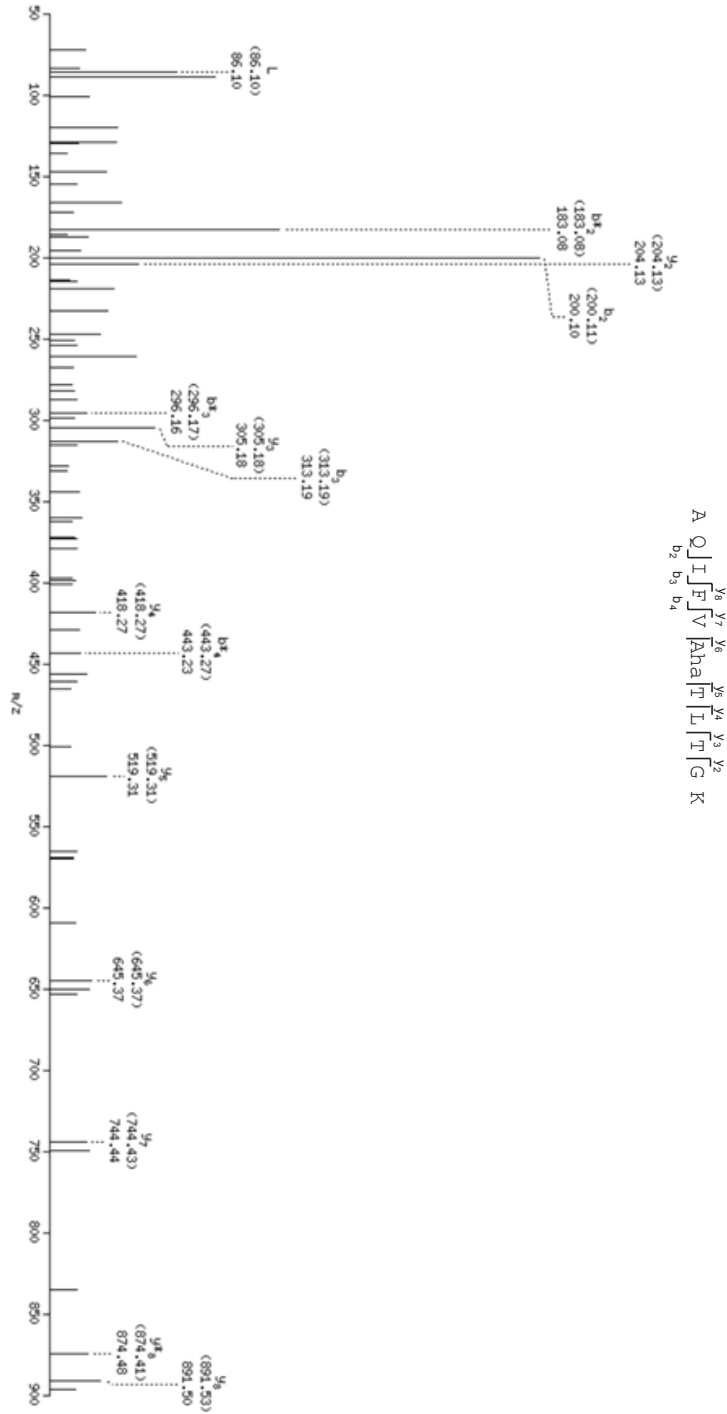

C K11Aha Ub

1 MAQIFVKTLT GAhaTITLEVEP SDTIENVKAK IQDKEGIPPD QQRLIFAGKQ

51 LEDGRTLSDY NIQKESTLHL VLRLRGG

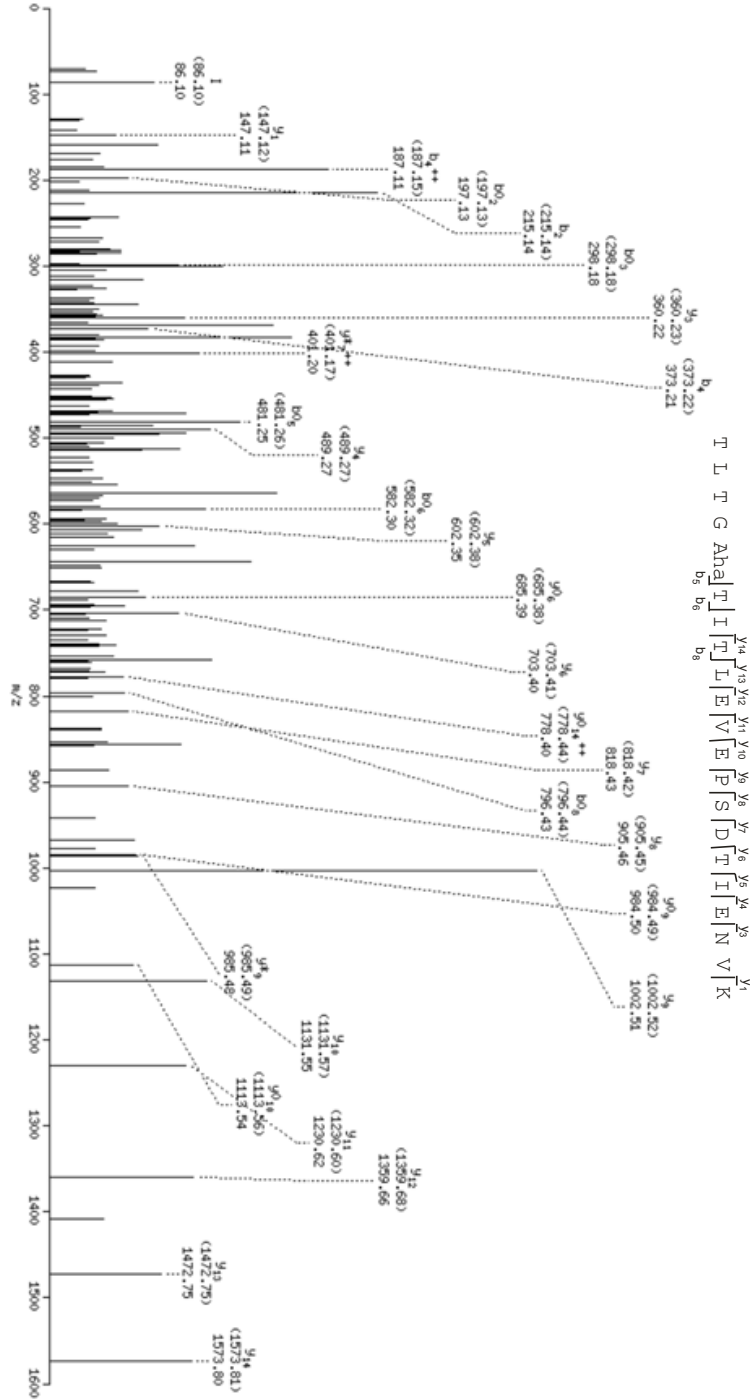

D K27Aha Ub

1 MAQIFVKTLT GKTTITLEV EP SDTIENVAhaAK IQDKEGIPPD QQLRIFAGKQ

51 LEDGRTLSDY NIQKESTLHL VLRLRGG

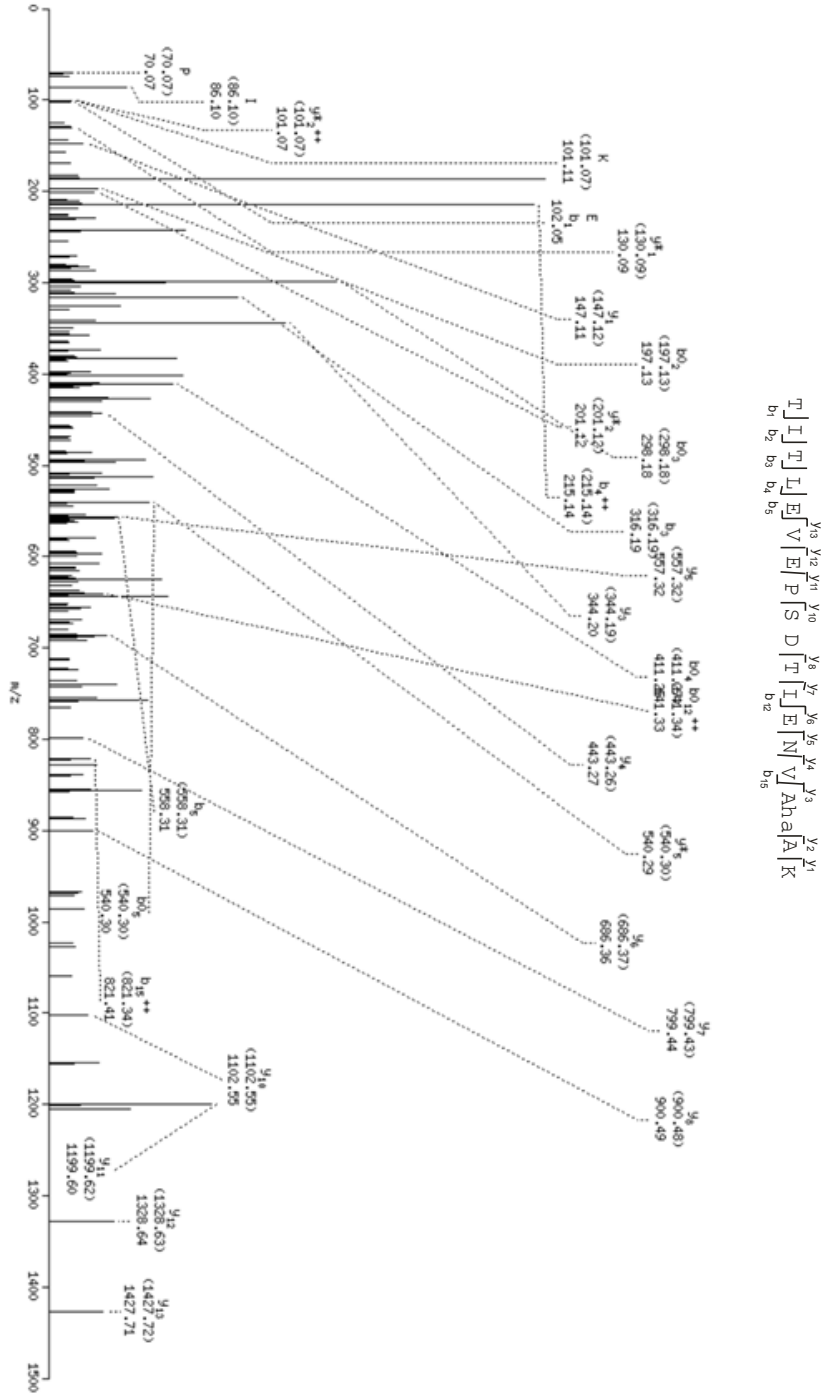

**E K29Aha Ub**

**1 MAQIFVKTLT GKTITLEVEP SDTIENVKA**Aha **IQDKEGIPPD QQRLIFAGKQ**

**51 LEDGRTLSDY NIQKESTLHL VLRLRG**

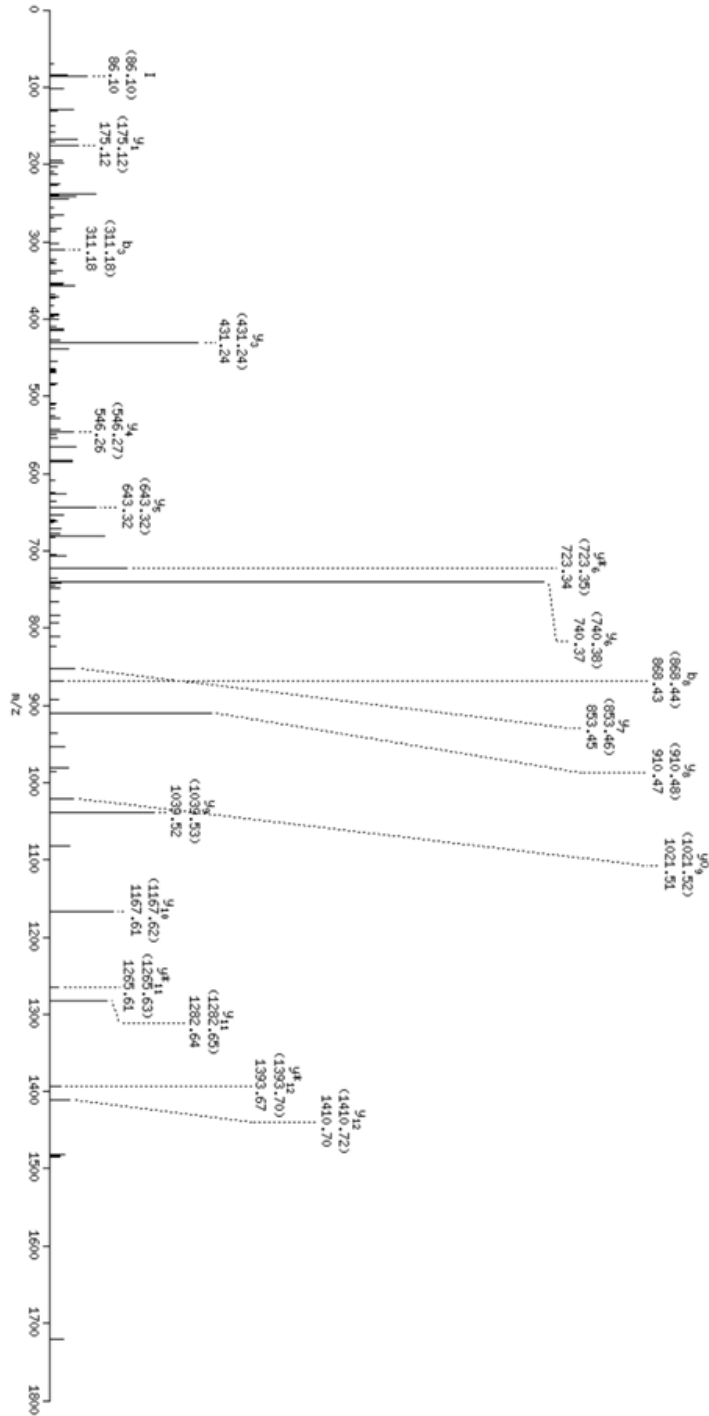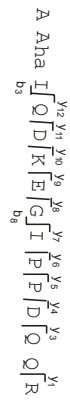



**F K33Aha Ub**

**1 MAQIFVKTLT GKTITLEVEP SDTIENVKAK IQDAhaEGIPPD QQRLIFAGKQ**

**51 LEDGRTLSDY NIQKSTLHL VLRLRG**

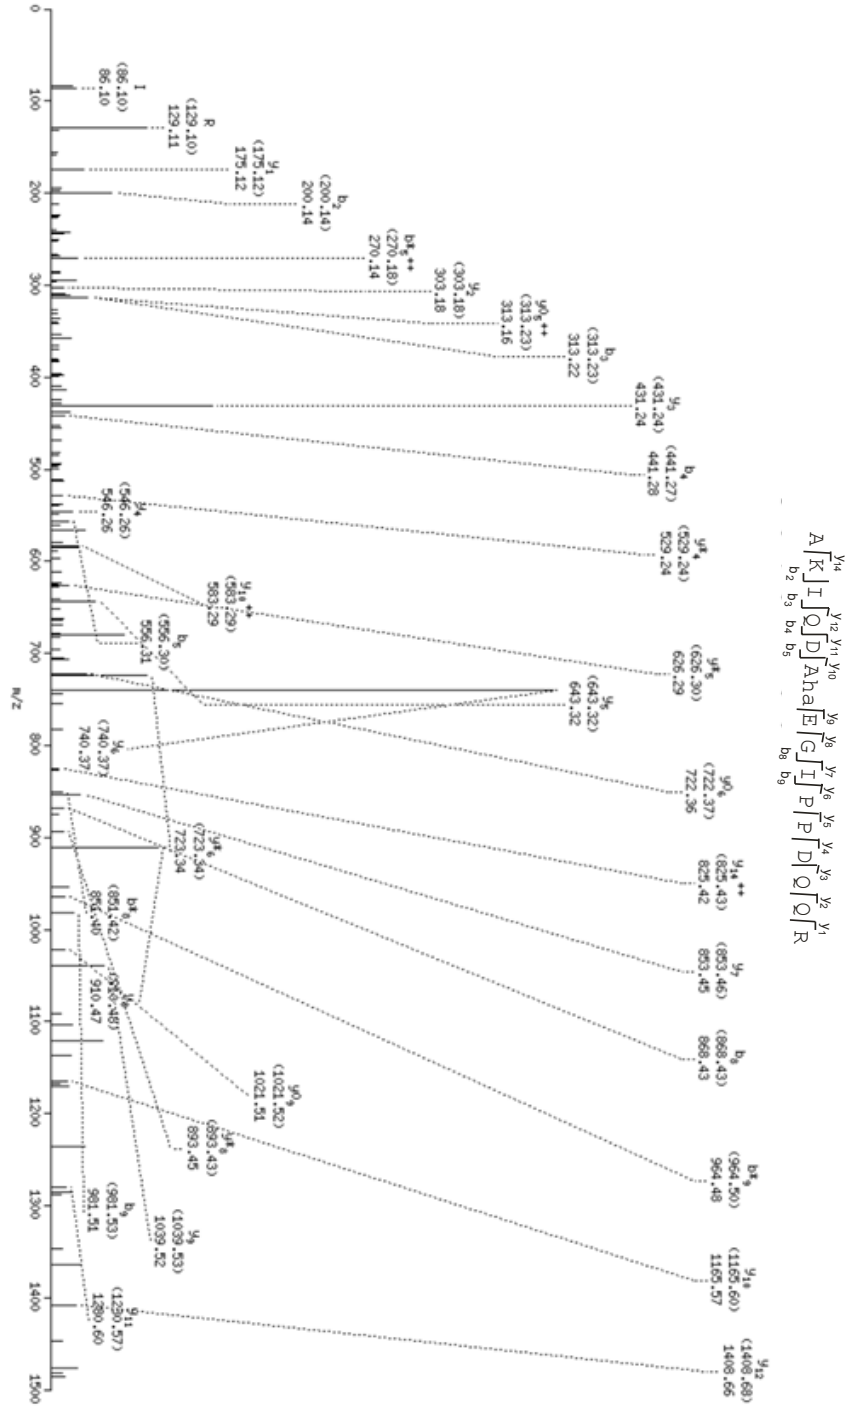

**G K48Aha Ub**

**1 MAQIFVKTLT GKTITLEVEP SDTIENVKAK IQDKEGIPPD QQR LIFAG AhaQ**

**51 LEDGR T L S D Y N I Q K E S T L H L V L R L R G G**

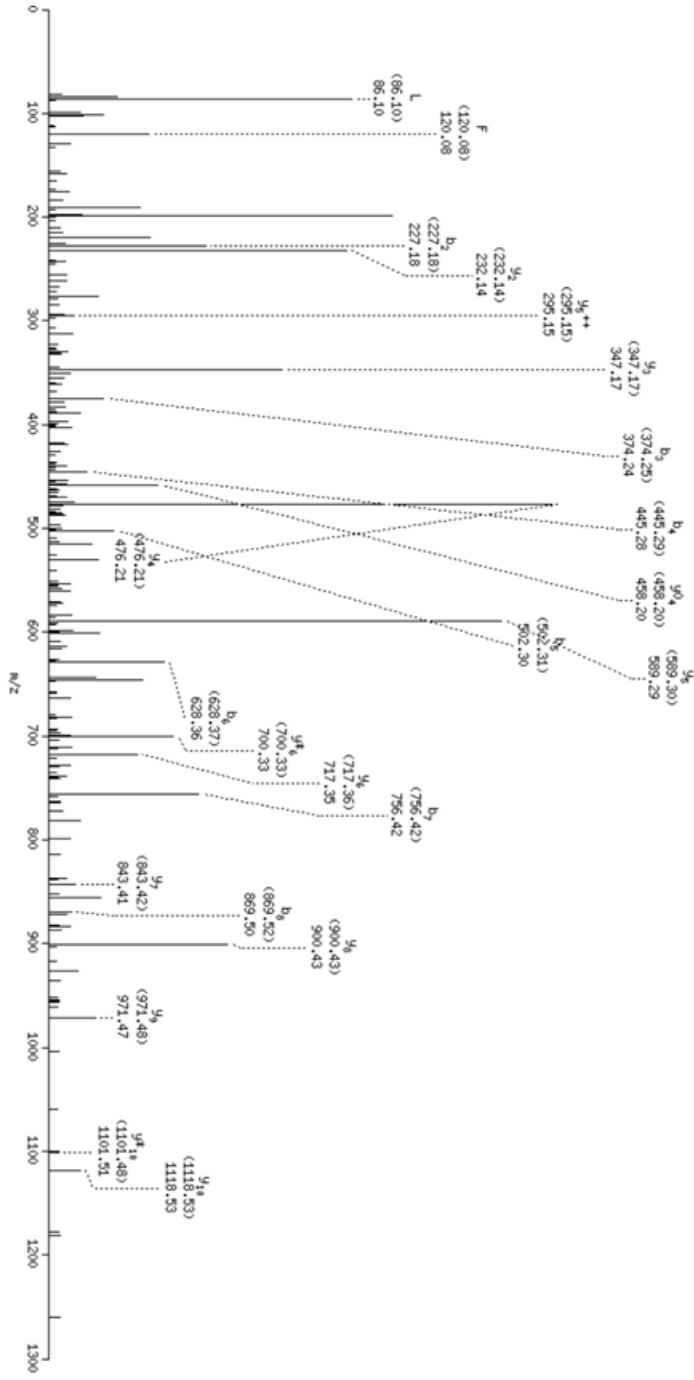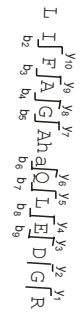

# H K63Aha Ub

1 MAQIFVKTLT GKTITLEVEP SDTIENVKAK IQDKEGIPPD QQRLIFAGKQ

51 LEDGRTLSDY NIQAhaESTLHL VLRLRGG

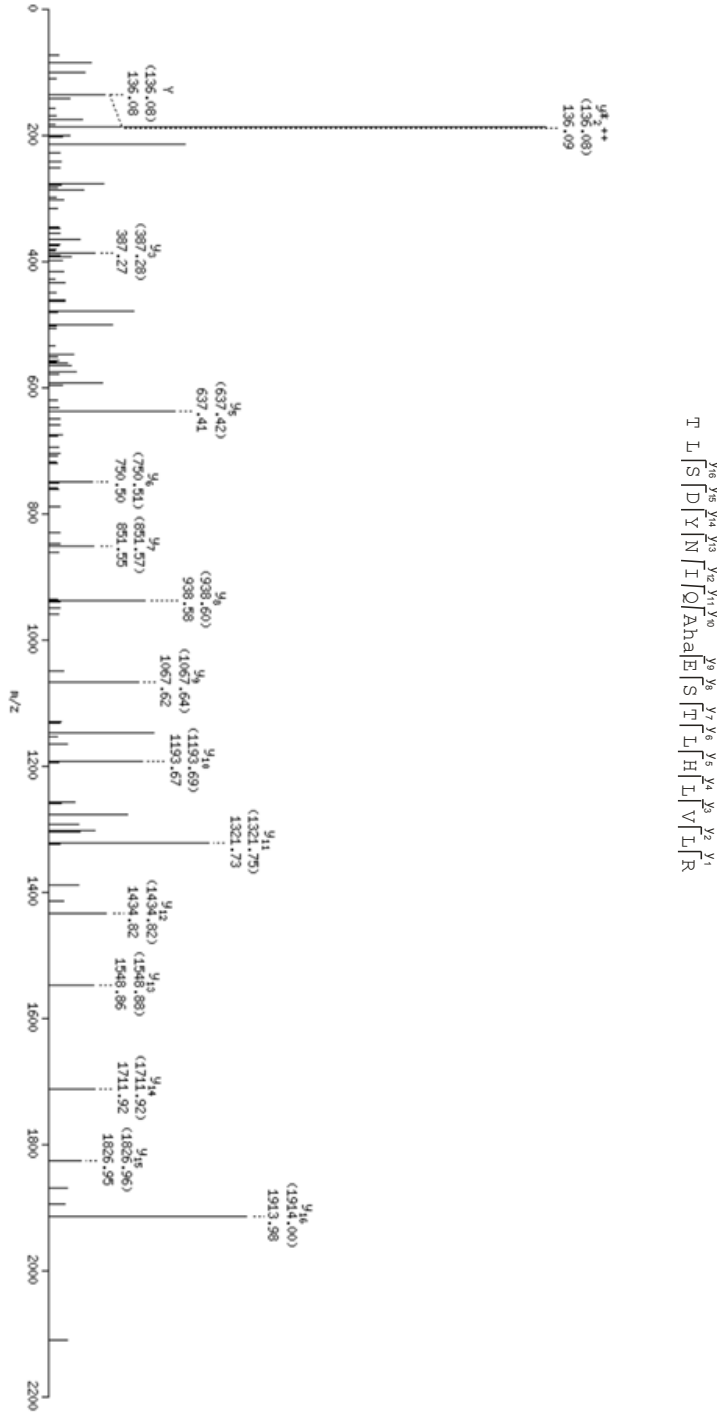

## Figure S3 (related to Figure 5A). LC-MS/MS results for Di-Ub probe trap regions

MS/MS spectra of the peptidic fragments of trypsin digested Di-Ub probes bearing the electrophilic trap derived covalent adduct in position M1 (**A**), K6 (**B**), K11 (**C**), K27 (**D**), K33 (**E**), or K63 (**F**), respectively. No MS/MS spectrum containing the probe adduct at the K29 position was detected. The proximal Ubiquitin derived peptides are shown with addition of the distal Ubiquitin C-terminal fragment as a modification. The b and y fragment ions are indicated in blue and red, respectively.

### A M1 Di-Ub probe

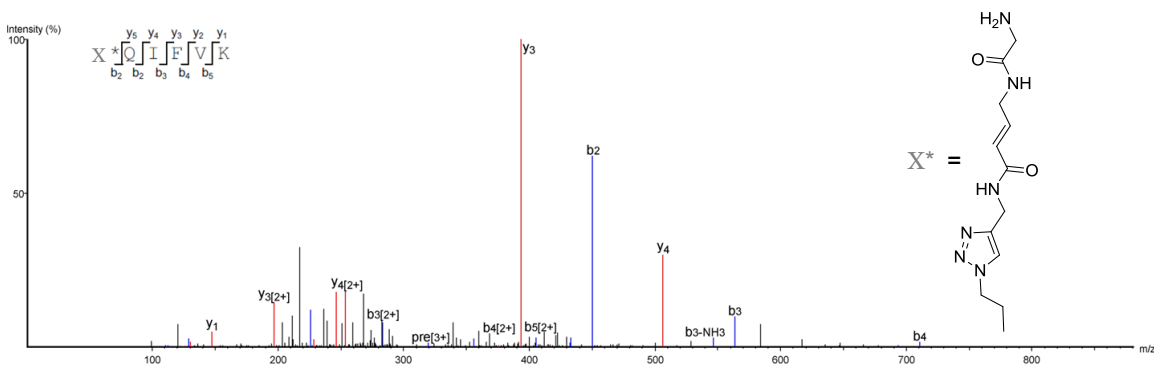

### B K6 Di-Ub probe

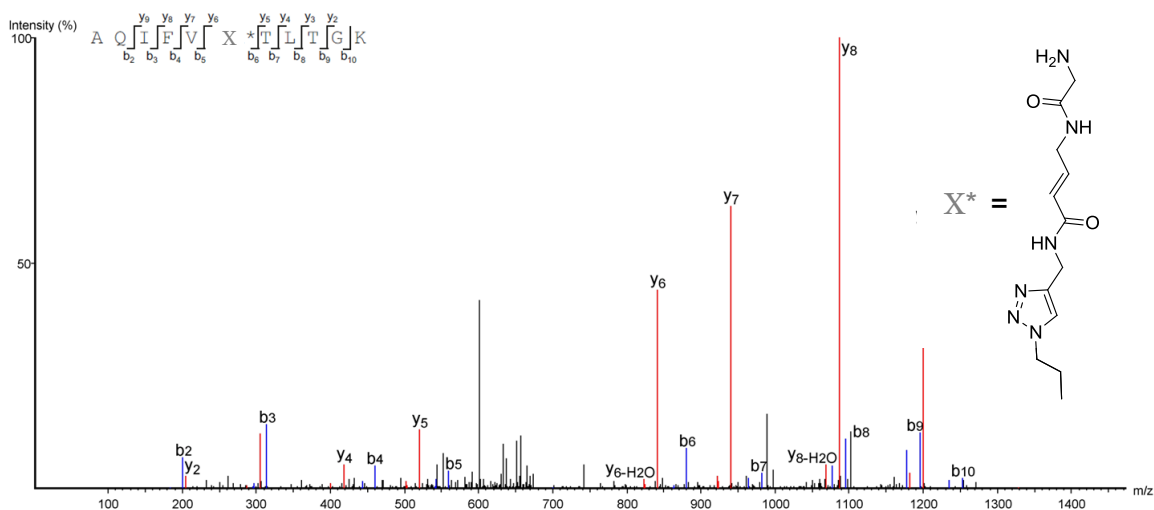

**C K11 Di-Ub probe**

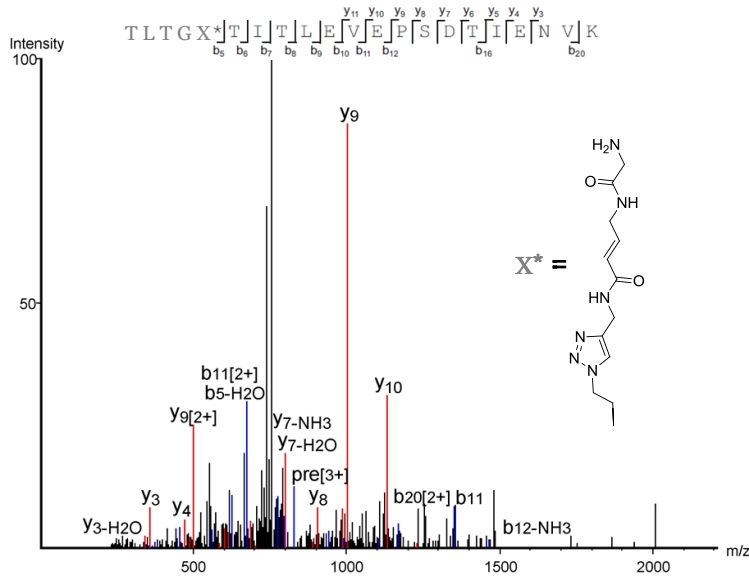

**D K27 Di-Ub probe**

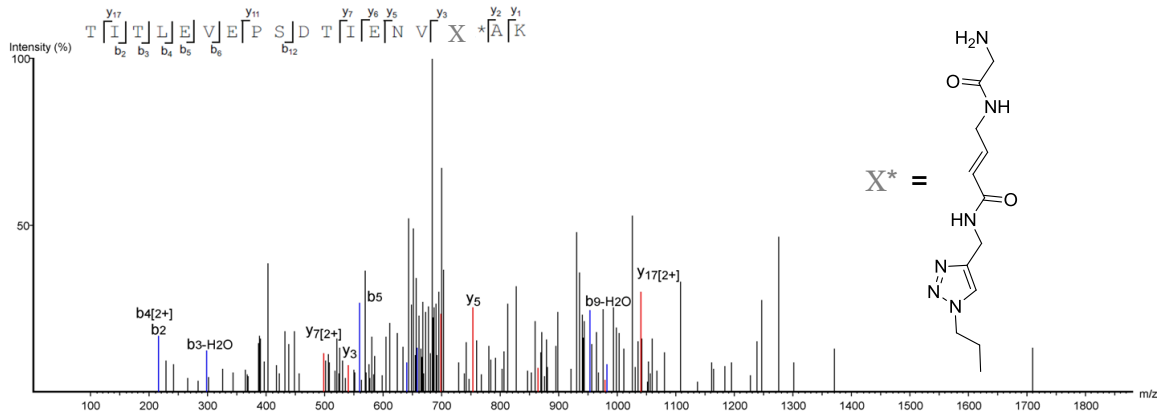

**E K33 Di-Ub probe**

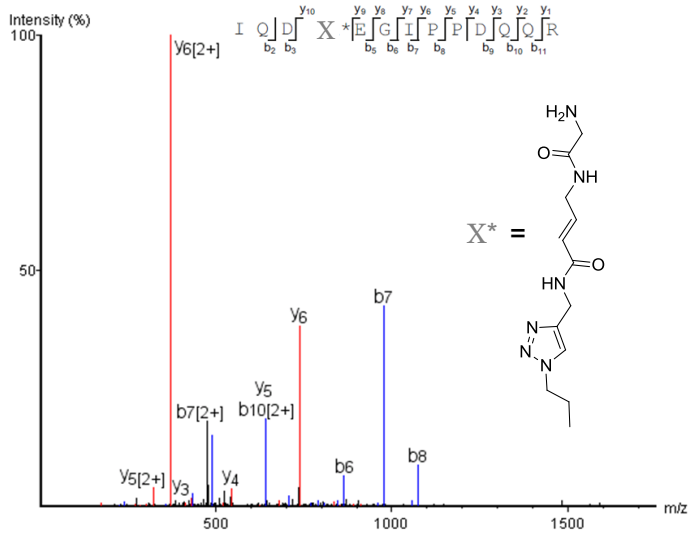

**F K63 Di-Ub probe**

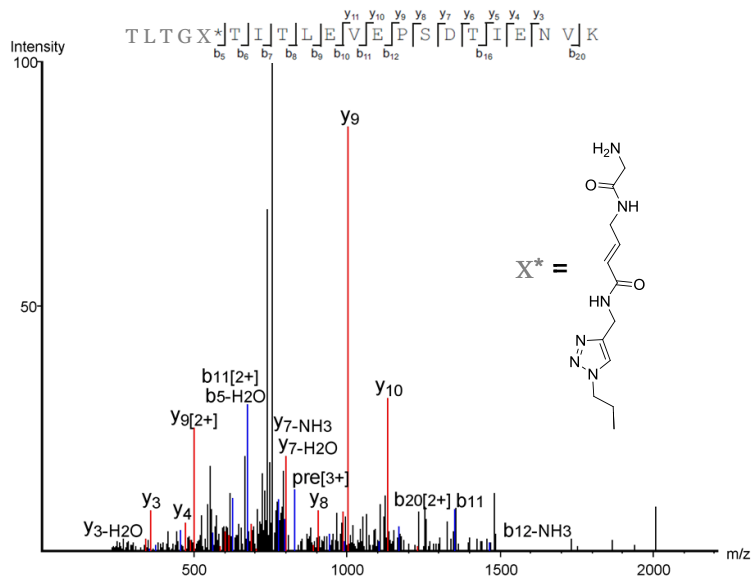

## DNA sequences for wildtype and mutant Ubiquitin

Complete DNA sequences of the wildtype and mutant Ubiquitin proteins that were prepared for this study. ATGs are indicated in bold for the introduction of Methionine residues that are then replaced with Aha (see Materials & Methods section).

### WT Ub

5'-**ATG**CAGATCTTCGTCAAGACGTTAACCGGTAAAACCATAACTCTGGAAGTTGAACCATCCGATACCATCGAAAACGTTAAGGCTAAAATTCAAGACAAGGAAGGAATTCCACCTGATCAACAAAGATTGATCTTTGCCGGTAAGCAGCTCGAGGACGGTAGAACGCTGTCTGATTACAACATTCAGAAGGAGTCGACCTTACATCTTGTCTTAAGACTAAGAGGTGGTTGA -3'

### K6M Ub

5'-**ATG**GCGCAGATCTTCGT**ATG**ACGTTAACCGGTAAAACCATAACTCTGGAAGTTGAACCATCCGATACCATCGAAAACGTTAAGGCTAAAATTCAAGACAAGGAAGGAATTCCACCTGATCAACAAAGATTGATCTTTGCCGGTAAGCAGCTCGAGGACGGTAGAACGCTGTCTGATTACAACATTCAGAAGGAGTCGACCTTACATCTTGTCTTAAGACTAAGAGGTGGTTGA-3'

### K11M Ub

5'-**ATG**GCGCAGATCTTCGTCAAGACGTTAACCGGT**ATG**ACCATAACTCTGGAAGTTGAACCATCCGATACCATCGAAAACGTTAAGGCTAAAATTCAAGACAAGGAAGGAATTCCACCTGATCAACAAAGATTGATCTTTGCCGGTAAGCAGCTCGAGGACGGTAGAACGCTGTCTGATTACAACATTCAGAAGGAGTCGACCTTACATCTTGTCTTAAGACTAAGAGGTGGTTGA -3'

### K27M Ub

5'-**ATG**GCGCAGATCTTCGTCAAGACGTTAACCGGTAAAACCATAACTCTGGAAGTTGAACCATCCGATACCATCGAAAACGTT**ATG**GCTAAAATTCAAGACAAGGAAGGAATTCCACCTGATCAACAAAGATTGATCTTTGCCGGTAAGCAGCTCGAGGACGGTAGAACGCTGTCTGATTACAACATTCAGAAGGAGTCGACCTTACATCTTGTCTTAAGACTAAGAGGTGGTTGA -3'

**K29M Ub**

5'-**ATGGCGCAGATCTTCGTCAAGACGTTAACCGGTAAAACCATAACTCTGGAAGTTGAACCATCCGATAC**  
CATCGAAAACGTTAAGGCT**ATG**ATTCAAGACAAGGAAGGAATTCCACCTGATCAACAAAGATTGATCTTT  
GCCGGTAAGCAGCTCGAGGACGGTAGAACGCTGTCTGATTACAACATTCAGAAGGAGTCGACCTTACAT  
CTTGTCTTAAGACTAAGAGGTGGTTGA -3'

**K33M Ub**

5'-**ATGGCGCAGATCTTCGTCAAGACGTTAACCGGTAAAACCATAACTCTGGAAGTTGAACCATCCGATAC**  
CATCGAAAACGTTAAGGCTAAAATTCAAGAC**ATG**GAAGGAATTCCACCTGATCAACAAAGATTGATCTTT  
GCCGGTAAGCAGCTCGAGGACGGTAGAACGCTGTCTGATTACAACATTCAGAAGGAGTCGACCTTACAT  
CTTGTCTTAAGACTAAGAGGTGGTTGA -3'

**K48M Ub**

5'-**ATGGCGCAGATCTTCGTCAAGACGTTAACCGGTAAAACCATAACTCTGGAAGTTGAACCATCCGATAC**  
CATCGAAAACGTTAAGGCTAAAATTCAAGACAAGGAAGGAATTCCACCTGATCAACAAAGATTGATCTTT  
GCCGGT**ATG**CAGCTCGAGGACGGTAGAACGCTGTCTGATTACAACATTCAGAAGGAGTCGACCTTACAT  
CTTGTCTTAAGACTAAGAGGTGGTTGA-3'

**K63M Ub**

5'-**ATGGCGCAGATCTTCGTCAAGACGTTAACCGGTAAAACCATAACTCTGGAAGTTGAACCATCCGATAC**  
CATCGAAAACGTTAAGGCTAAAATTCAAGACAAGGAAGGAATTCCACCTGATCAACAAAGATTGATCTTT  
GCCGGTAAGCAGCTCGAGGACGGTAGAACGCTGTCTGATTACAACATTCAG**ATG**GAGTCGACCTTACAT  
CTTGTCTTAAGACTAAGAGGTGGTTGA-3'



**Supplemental Table 1 (related to Figure 2). Primer sequences used for generating the Aha Ub mutants**

| Ub mut*              | Forward primer (5'-3')                         | Reverse primer (5'-3')                          |
|----------------------|------------------------------------------------|-------------------------------------------------|
| Insertion of A pos 2 | GGAGAGGATCCATGGCGCAGATCTTCGTCAAG               | CTTGACGAAGATCTGCGCCATGGATCCTCTCC                |
| K6M                  | GGCGCAGATCTTCGTTCATGACGTTAACCGGTAAAAC          | GTTTTACCGGTTAACGTCATGACGAAGATCTGCGCC            |
| K11M                 | CAAGACGTTAACCGGTATGACCATAACTCTGGAAG            | CTTCCAGAGTTATGGTCATACCGGTTAACGTCCTTG            |
| K27M                 | CCGATACCATCGAAAACGTTATGGCTAAAATTCAAGA<br>CAAGG | CCTTGTCTTGAATTTTAGCCATAACGTTTTTCGATGGTA<br>TCGG |
| K29M                 | CGAAAACGTTAAGGCTATGATTCAAGACAAGGAAG            | CTTCCTTGTCTTGAATCATAGCCTTAACGTTTTTCG            |
| K33M                 | GCTAAAATTCAAGACATGGAAGGAATCCACCTG              | CAGGTGGAATTCCTTCCATGTCTTGAATTTTAGC              |
| K48M                 | GATCTTTGCCGGTATGCAGCTCGAGGAC                   | GTCCTCGAGCTGCATACCGGCAAAGATC                    |
| K63M                 | GATTACAACATTCAGATGGAGTCGACCTTACATC             | GATGTAAGGTCGACTCCATCTGAATGTTGTAATC              |

\*Ub mut: Position and amino acid substitution in the Ub protein sequence

## Supplemental Table 2 (related to Figure 7). Ubiquitin conjugation machinery detected in probe immunoprecipitation material

Components of the Ub conjugation machinery detected by mass spectrometry analysis of eluted material from immunoprecipitation of cell lysates labeled with Di-Ub probes are displayed: Protein name, UniprotKB accession number, number of peptides detected by MS and mono/Di-Ub probe pulldown where highest amount was detected by LC Progenesis Software analysis (see Experimental Procedures section of the main manuscript).

| Protein Name                | UniprotKB | Nr. of peptides | Di-Ub probe pulldown with highest abundance |
|-----------------------------|-----------|-----------------|---------------------------------------------|
| <b><sup>a</sup>HECT E3s</b> |           |                 |                                             |
| HECTD1                      | Q9ULT8    | 11              | M1 Di-Ub                                    |
| HERC1                       | Q15751    | 3               | M1 Di-Ub                                    |
| HUWE1                       | Q7Z6Z7    | 117             | M1 Di-Ub                                    |
| E3A                         | Q05086    | 6               | K27 Di-Ub                                   |
| E3C                         | Q15386    | 3               | M1 Di-Ub                                    |
| HECTD3                      | Q5T447    | 1               | M1 Di-Ub                                    |
| HERC4                       | Q5GLZ8    | 1               | Total HEK293T lysate                        |
| <b><sup>b</sup>RBR E3s</b>  |           |                 |                                             |
| ARIH1                       | Q9Y4X5    | 2               | M1 Di-Ub                                    |
| RNF31                       | Q96EP0    | 1               | M1 Di-Ub                                    |
| <b><sup>c</sup>RING E3s</b> |           |                 |                                             |
| MYCBP2                      | O75592    | 10              | K11 Di-Ub                                   |
| RNF25                       | Q96BH1    | 4               | Total HEK293T lysate                        |
| TRIM25                      | Q14258    | 2               | K27 Di-Ub                                   |
| TRIM33                      | Q9UPN9    | 2               | K27 Di-Ub                                   |
| Listerin                    | O94822    | 1               | M1 Di-Ub                                    |
| RING1                       | Q06587    | 1               | K63 Di-Ub                                   |
| KCMF1                       | O94822    | 1               | M1 Di-Ub                                    |
| RAD18                       | Q9NS91    | 1               | M1 Di-Ub                                    |
| BRE                         | Q9NXR7    | 2               | Total HEK293T lysate                        |
| BRE1A                       | Q5VTR2    | 3               | M1 Di-Ub                                    |
| BRE1B                       | O75150    | 3               | Ub-Alkyne                                   |
| XIAP                        | P98170    | 4               | M1 Di-Ub                                    |
| RNF123                      | Q5XPI4    | 1               | several probes                              |
| TRIM37                      | Q5XPI4    | 1               | several probes                              |
| <b>Other E3s</b>            |           |                 |                                             |
| BRUCE                       | Q9NR09    | 3               | K27 Di-Ub                                   |
| CHIP                        | Q9UNE7    | 3               | K27 Di-Ub                                   |
| UBR4                        | Q5T4S7    | 30              | M1 Di-Ub                                    |
| UBR5                        | O95071    | 28              | Total HEK293T lysate                        |

|            |        |    |                      |
|------------|--------|----|----------------------|
|            |        |    |                      |
| <b>E1s</b> |        |    |                      |
| A1S9       | P22314 | 56 | M1 Di-Ub             |
| MOP-4      | A0AVT1 | 11 | M1 Di-Ub             |
|            |        |    |                      |
| <b>E2s</b> |        |    |                      |
| DDVit 1    | Q15819 | 2  | Ub Alkyne            |
| E2 C       | O00762 | 2  | M1 Di-Ub             |
| E2 D1      | P51668 | 2  | K6 Di-Ub             |
| E2 D3      | P61077 | 5  | Total HEK293T lysate |
| E2 K       | P61086 | 7  | M1 Di-Ub             |
| E2 N       | P61088 | 11 | M1 Di-Ub             |
| E2 O       | Q9C0C9 | 11 | M1 Di-Ub             |
| E2 E2      | Q96LR5 | 1  | M1 Di-Ub             |
| E2 L3      | P68036 | 1  | Ub VME               |
| E2 R1      | P49427 | 1  | M1 Di-Ub             |
| E2 T       | Q9NPD8 | 1  | M1 Di-Ub             |

<sup>a</sup>HECT domain containing E3 ubiquitin ligases

<sup>b</sup>RING-between-RING E3 ubiquitin ligases

<sup>c</sup>Really interesting gene (RING) domain containing E3 ubiquitin ligases
